# Supplementary material for: Genomic Determinants of Homologous Recombination Deficiency across Human Cancers
Source: MDPI journal article supplement (doi:10.3390/cancers13184572), 2021-09-12

# Partial Least Squares Path Modeling (PLS-PM)

Jointly germline and somatic contribution to signatures

germline affected genes

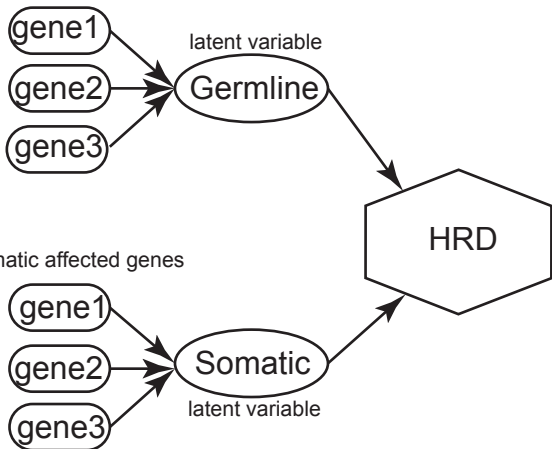

Supplement: s1 [file s1]
