# Supplementary figures and images for: Genomic Determinants of Homologous Recombination Deficiency across Human Cancers
Source: MDPI journal article supplement (doi:10.3390/cancers13184572), 2021-09-12

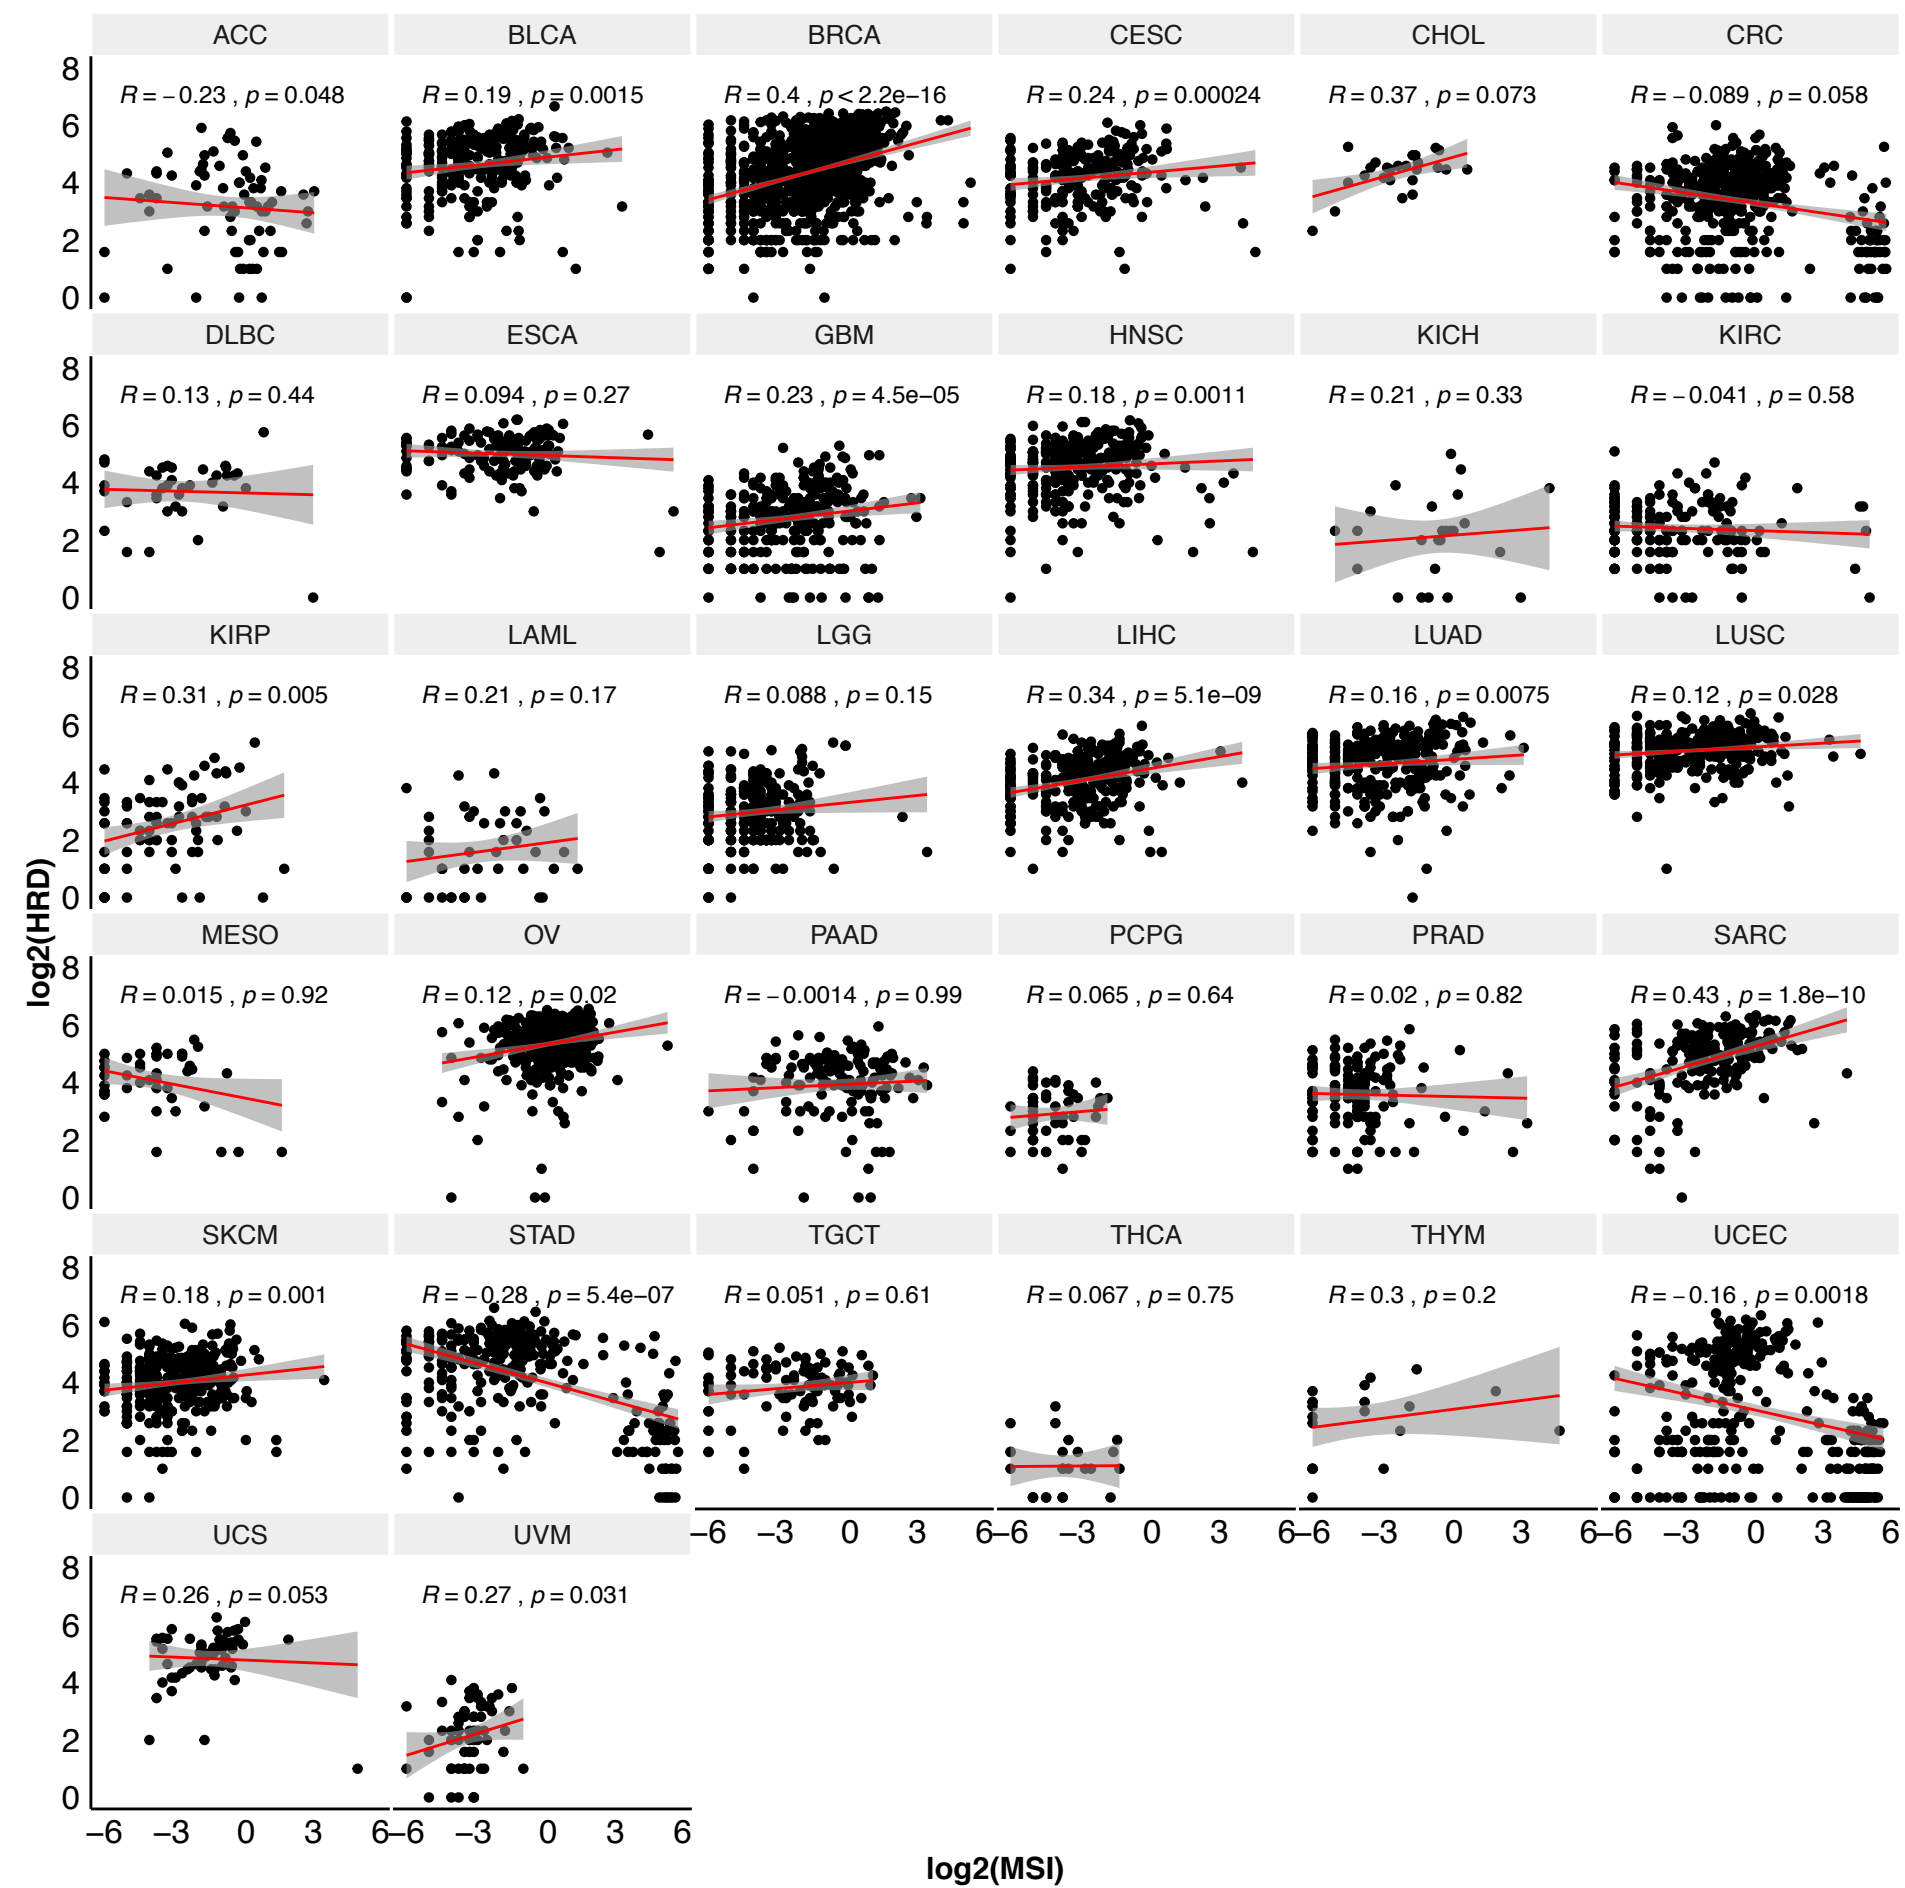

Supplement: s1 [file s1]

**Mutation data**

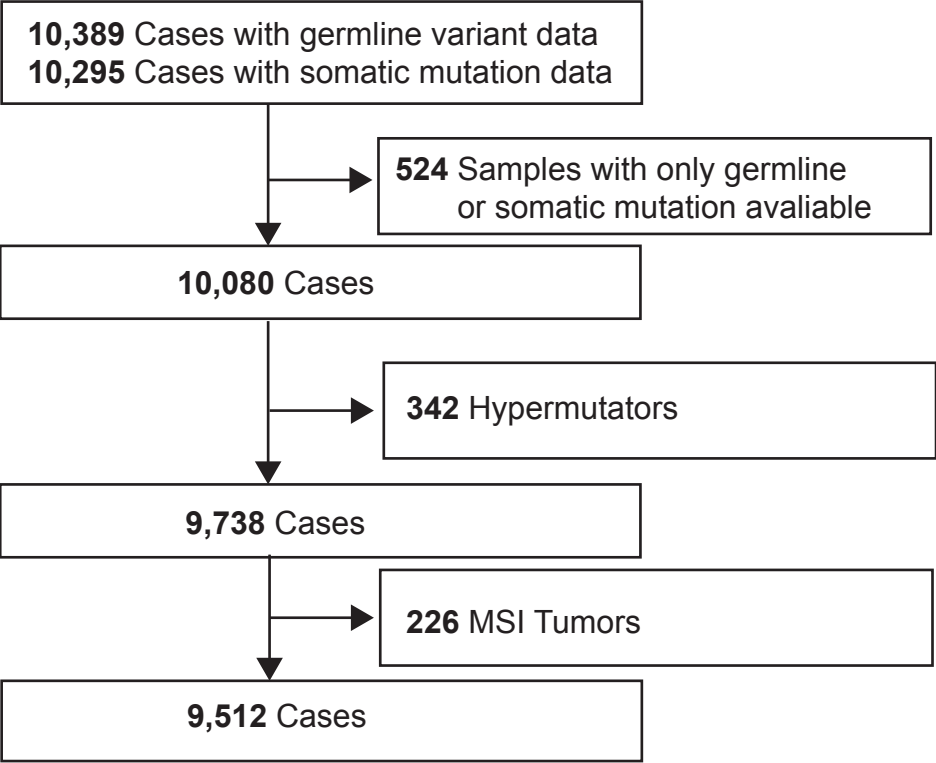

**Copy number variation data**

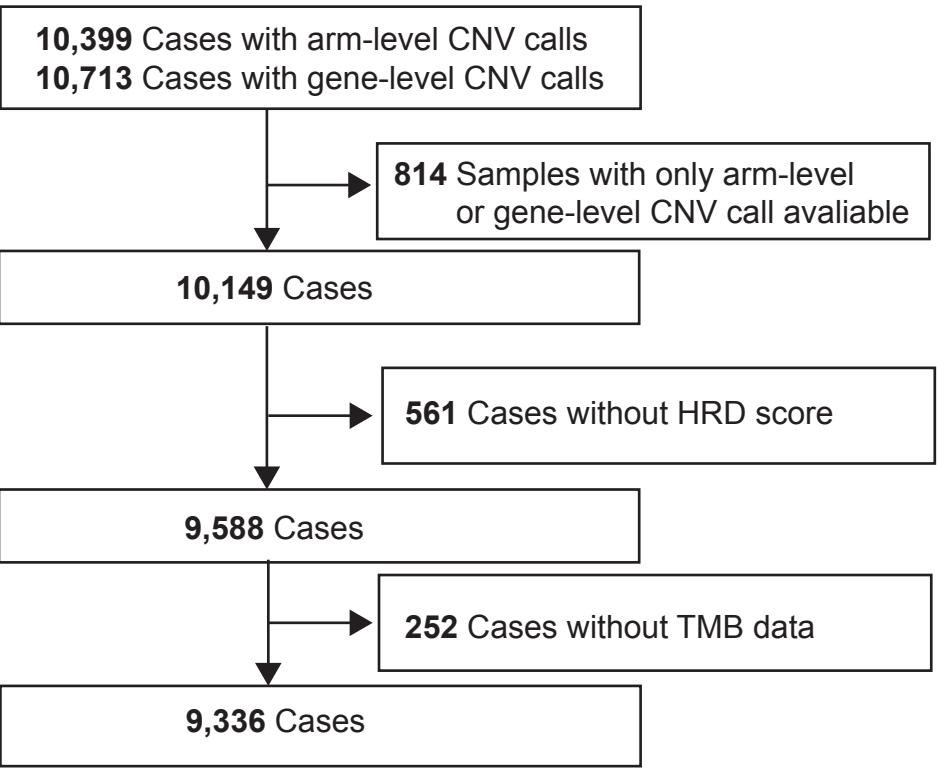

Supplement: s1 [file s1]
